# Supplementary material for: Single-stranded DNA ligation and XLF-stimulated incompatible DNA end ligation by the XRCC4-DNA ligase IV complex: influence of terminal DNA sequence
Source: PubMed Central journal article supplement — Nucleic Acids Res. 2007 Aug 23;35(17):5755–62. doi: 10.1093/nar/gkm579 (PMC2034460; doi:10.1093/nar/gkm579), 2007-08-23
Supplement: nar_gkm579_1.pdf [file nar_gkm579_1.pdf]

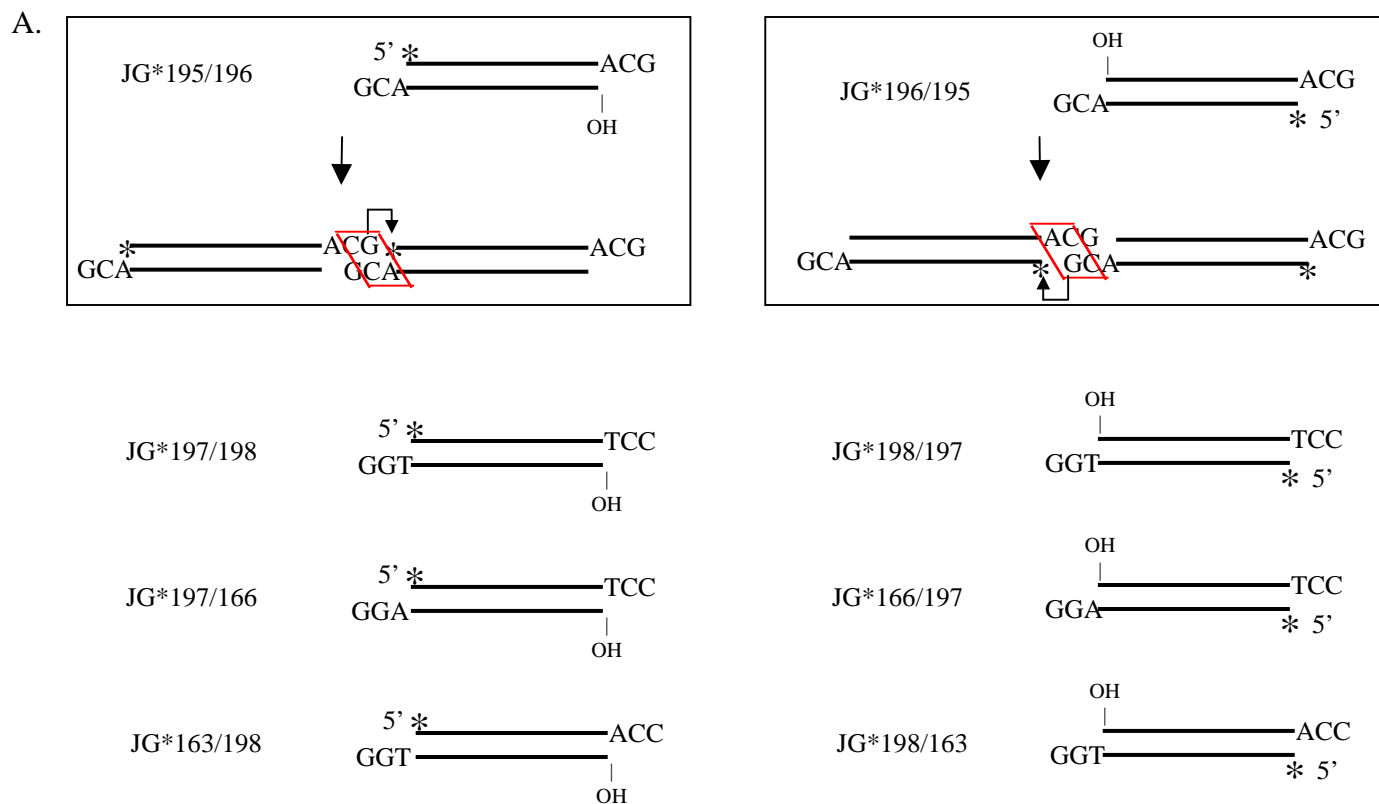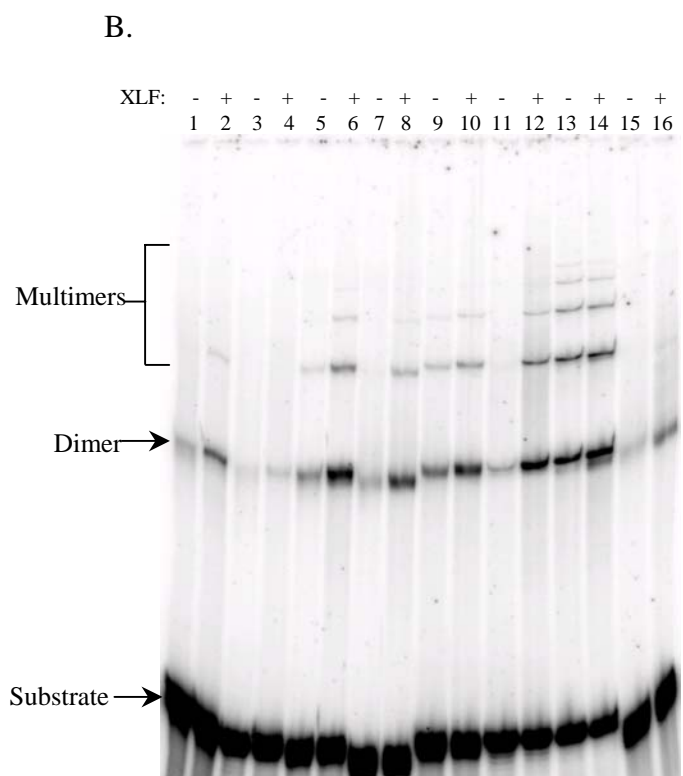

C.

| Ligation efficiency as a function of DNA sequence |            |       |       |                  |
|---------------------------------------------------|------------|-------|-------|------------------|
| Lane No.                                          | Substrate  | -XLF  | +XLF  | Fold Stimulation |
| 1,2                                               | JG*195/196 | 0.68% | 2.1%  | 3.1              |
| 3,4                                               | JG*196/195 | 0.27% | 0.43% | 1.6              |
| 5,6                                               | JG*197/198 | 3.6%  | 14%   | 3.9              |
| 7,8                                               | JG*198/197 | 1.3%  | 8.8%  | 6.8              |
| 9,10                                              | JG*197/166 | 3.7%  | 9.6%  | 2.6              |
| 11,12                                             | JG*166/197 | 1.1%  | 15%   | 14               |
| 13,14                                             | JG*163/198 | 14%   | 25%   | 1.8              |
| 15,16                                             | JG*198/163 | 1.4%  | 3.7%  | 2.6              |

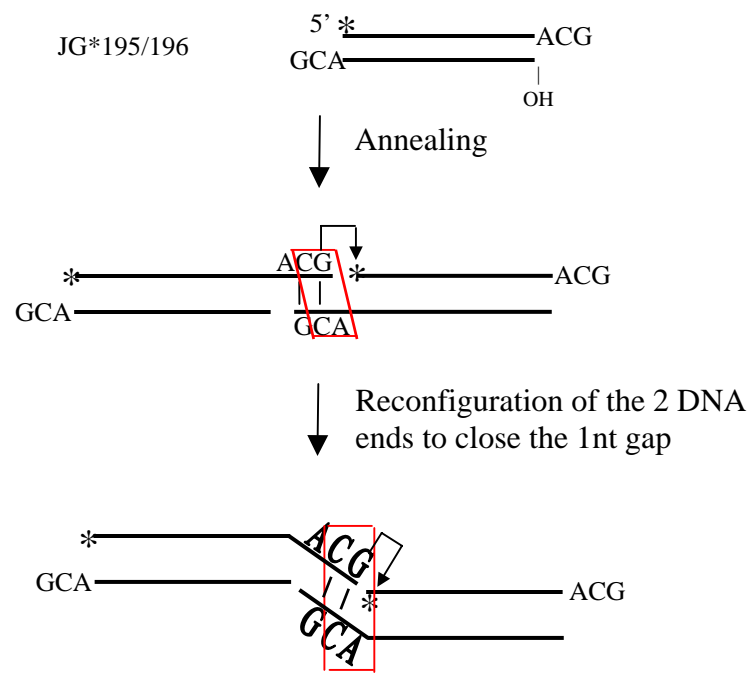

Suppl. Fig. 2

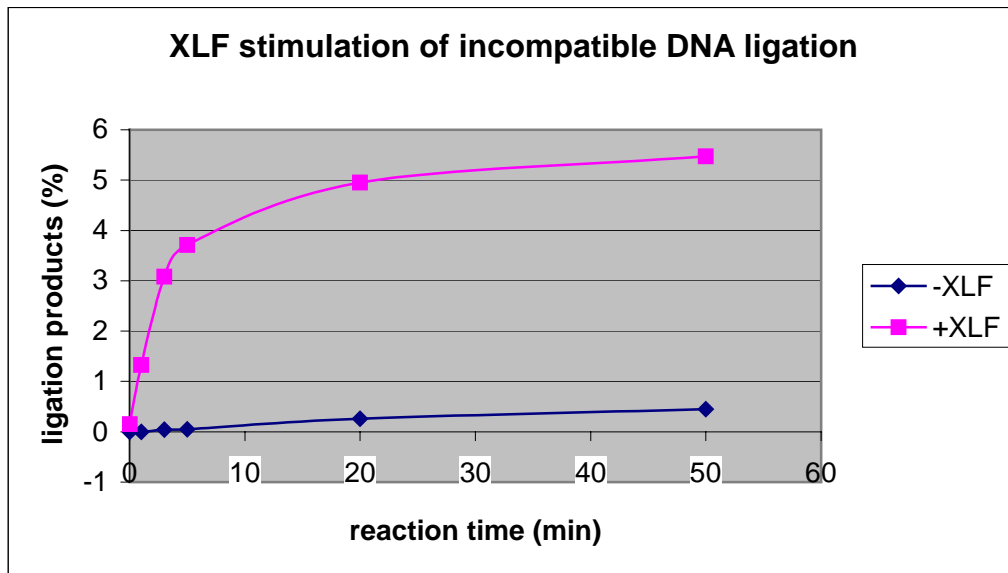

Suppl. Fig. 3

A.

JG169: TTTTTTTTTTTTTTTTTTTTTTTTTTTTTTTTTT 30mer

YM145: TTTTTTTTTTTTTTTTTTTTTT 20mer

YM\*130/YM68

YM\*149/YM68

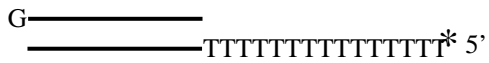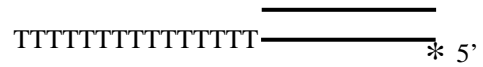

B.

|        |   |   |   |   |   |   |   |   |   |    |
|--------|---|---|---|---|---|---|---|---|---|----|
| X4/LIV | + | + | + | + | + | + | + | + | + | +  |
| Ku     | - | - | - | - | + | - | + | - | - | -  |
| XLF    | - | - | - | - | - | + | + | - | - | -  |
|        | 1 | 2 | 3 | 4 | 5 | 6 | 7 | 8 | 9 | 10 |

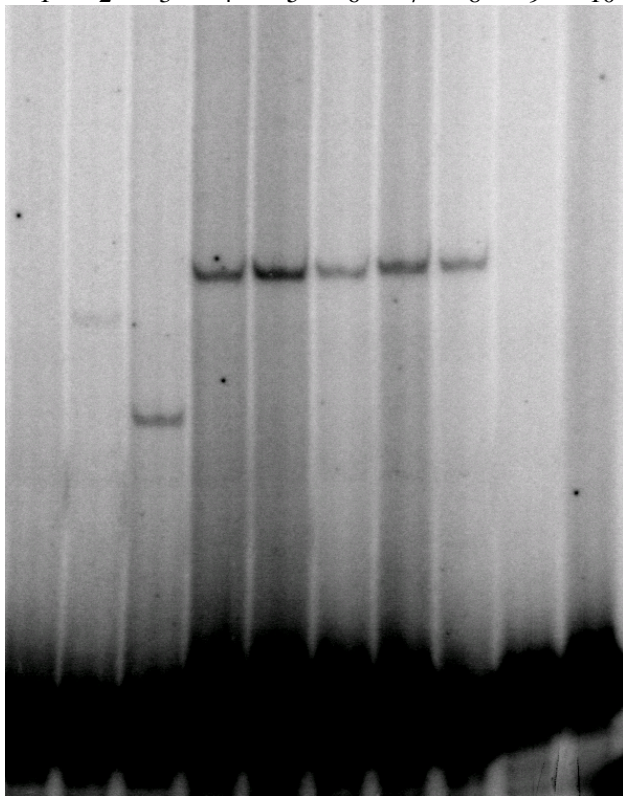

| Lane No. | Substrate                 | Lane No. | Substrate                 |
|----------|---------------------------|----------|---------------------------|
| 1        | YM*130/YM68               | 6        | YM*130/YM68 + YM*149/YM68 |
| 2        | YM*130/YM68 + JG169       | 7        | YM*130/YM68 + YM*149/YM68 |
| 3        | YM*130/YM68 + YM145       | 8        | YM*130/YM68 + YM149/YM68  |
| 4        | YM*130/YM68 + YM*149/YM68 | 9        | YM*149/YM68               |
| 5        | YM*130/YM68 + YM*149/YM68 | 10       | YM*149/YM68 + YM130/YM68  |

Suppl. Fig. 4
